# Supplementary material for: FGFR2 is required for airway basal cell self-renewal and terminal differentiation
Source: Oxford University Press journal article supplement (doi:10.1242/dev.135681), 2017-01-01
Supplement: dev135681supp.pdf [file dev135681supp.pdf]

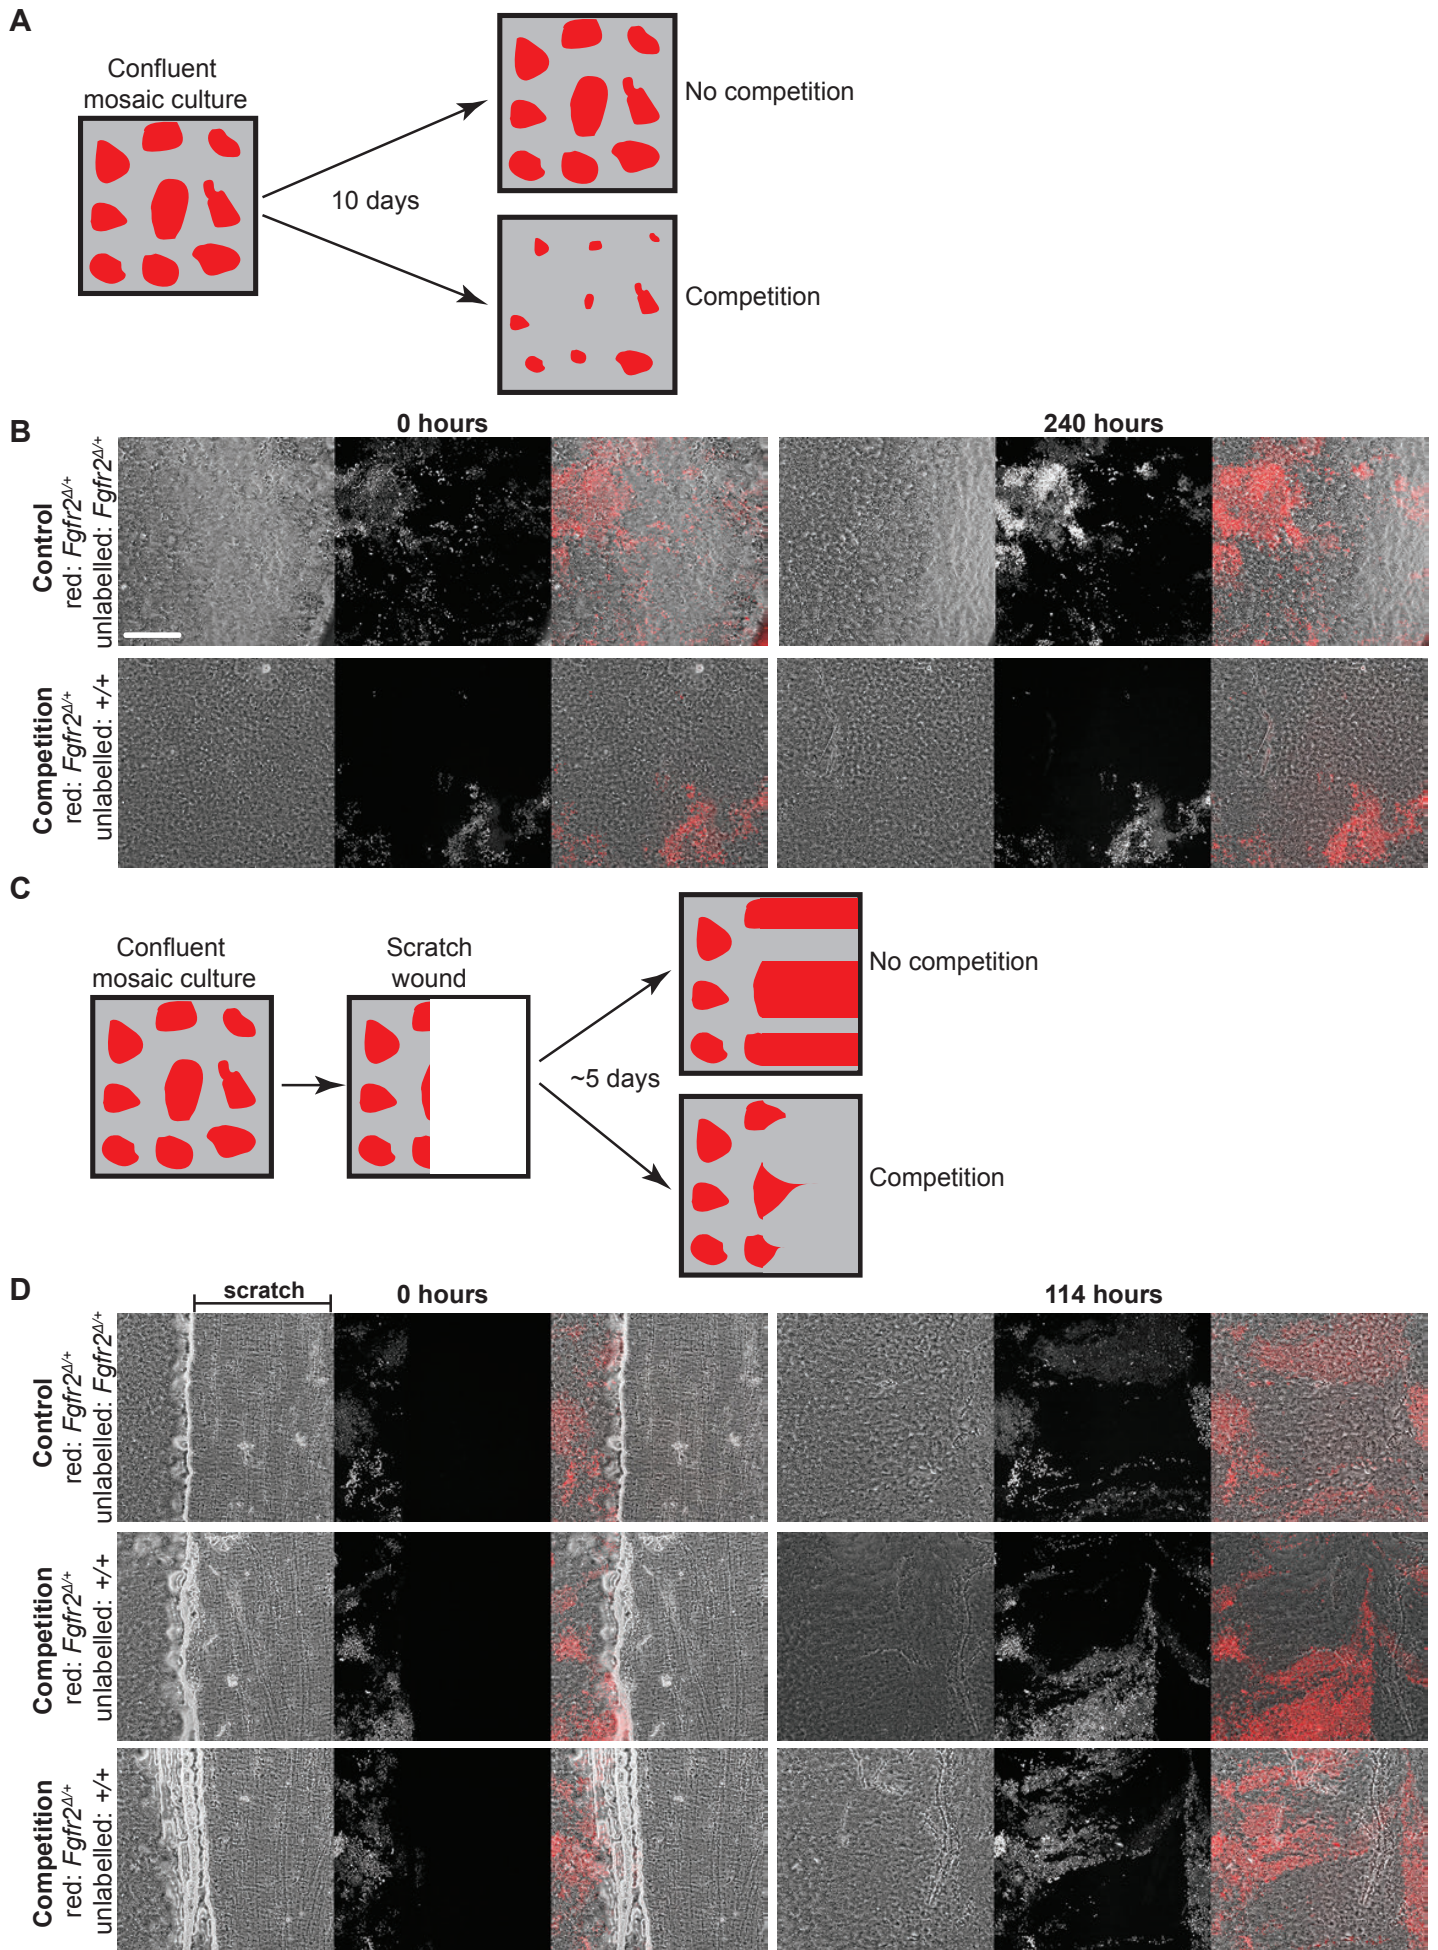

**Figure S1. No evidence for cell competition between *Fgfr2<sup>A/+</sup>* and *Fgfr2<sup>+/+</sup>* basal cells in vitro.** (A) Experimental set-up in B. Freshly isolated basal cells were mixed at a 1:2 ratio, grown to confluence on cell culture inserts and imaged at intervals for 10 days. In cultures with no competition both cell populations will continue at the same ratio, whereas in cultures with competition the patch size of the “loser” cell population will decrease over time. (B) 0 and 240 hour frames from phase contrast/red channel time-lapse experiments. Upper panel: control experiment, red cells: *Fgfr2<sup>A/+</sup>*, unlabelled cells: *Fgfr2<sup>A/+</sup>*. Lower panel: competition experiment, red: *Fgfr2<sup>A/+</sup>*, unlabelled: *Fgfr2<sup>+/+</sup>*. No evidence for competition was observed. (C) Experimental set-up in D. Freshly isolated basal cells were mixed at a 1:2 ratio, grown to confluence on cell culture inserts, mechanically wounded using a pipette tip and imaged at intervals for 5 days. In cultures with no competition labelled and unlabelled cells will contribute approximately equally to wound closure. In cultures with competition, the “loser” cell population will contribute less to wound closure. (D) 0 hour and 114 hour frames from phase contrast/red channel time-lapse experiments. Upper panel: control experiment, red cells: *Fgfr2<sup>A/+</sup>*, unlabelled cells: *Fgfr2<sup>A/+</sup>*. Lower panels: competition experiment, red cells: *Fgfr2<sup>A/+</sup>*, unlabelled cells: *Fgfr2<sup>+/+</sup>*. No evidence for competition was observed. Bar = 0.5 mm in all panels. See also movies 1-5.



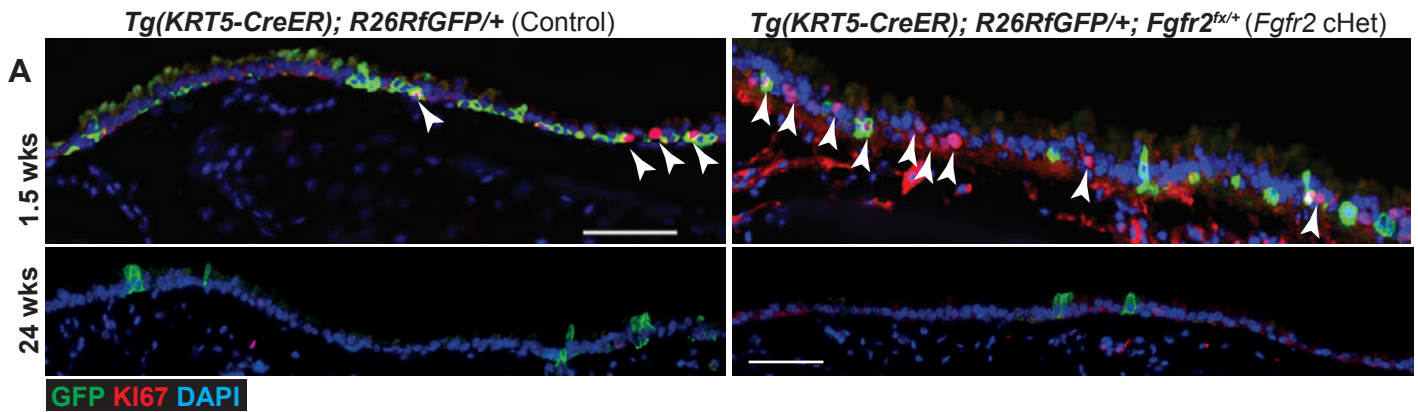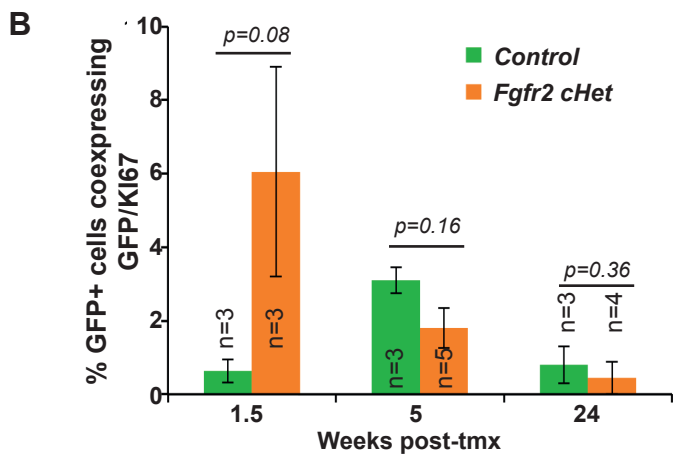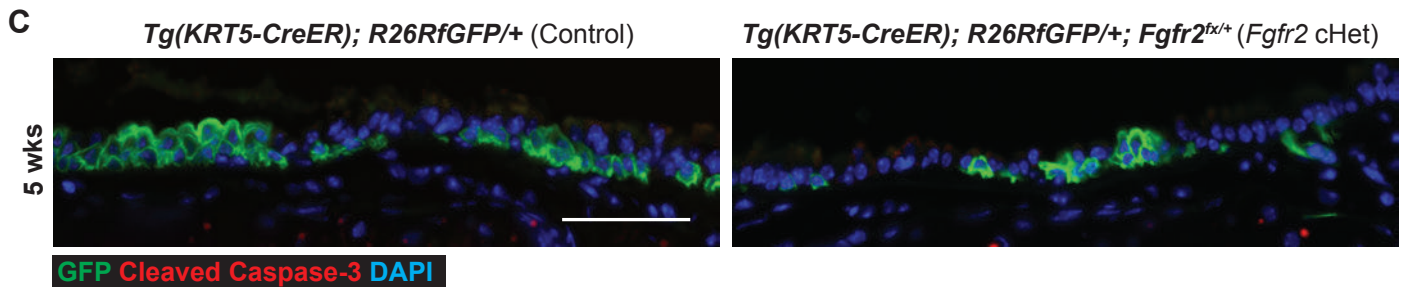

**D** E18.5 *GR*<sup>-/-</sup> lung (Positive control for Caspase-3 staining)

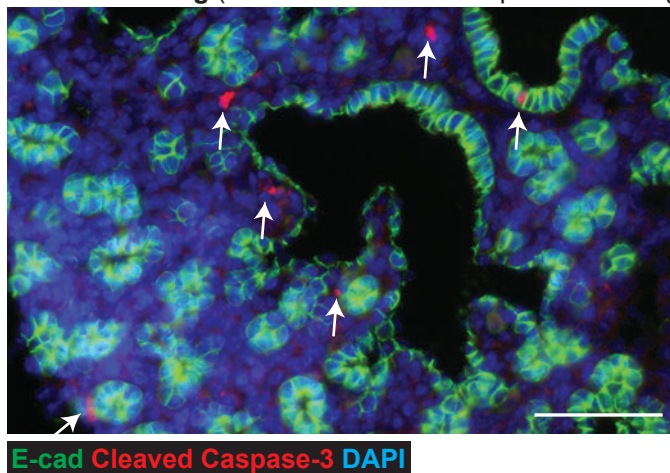

**Figure S2. *Fgfr2* conditional heterozygous basal cells can proliferate and show no evidence of apoptosis.** (A) Sections from control *Tg(KRT5-CreER); Rosa26R<sup>fGFP/+</sup>* and cHet *Tg(KRT5-CreER); Rosa26R<sup>fGFP/+</sup>; Fgfr2<sup>fx/+</sup>* tracheae at 1.5 and 24 weeks post-tmx. Green: GFP (*Rosa* reporter); red: KI67 (proliferating cells); blue: DAPI (nuclei). Arrowheads mark KI67 positive cells. (B) Quantitation of the percentage of GFP<sup>+</sup> cells that co-express KI67 throughout the experimental timecourse. Error bars = sem. (C) Sections from control *Tg(KRT5-CreER); Rosa26R<sup>fGFP/+</sup>* and cHet *Tg(KRT5-CreER); Rosa26R<sup>fGFP/+</sup>; Fgfr2<sup>fx/+</sup>* tracheae at 5 weeks post-tmx. Green: GFP (*Rosa* reporter); red: Cleaved Caspase-3 (apoptotic cells); blue: DAPI (nuclei). (D) Section of E18.5 Glucocorticoid receptor null lung (GR<sup>-/-</sup>, also known as *Nr3c1*) as a positive control for Cleaved Caspase-3 staining. Green: E-cadherin (lateral membranes); red: Cleaved Caspase-3 (apoptotic cells); blue: DAPI (nuclei). Scale bar = 50  $\mu$ m in all panels.

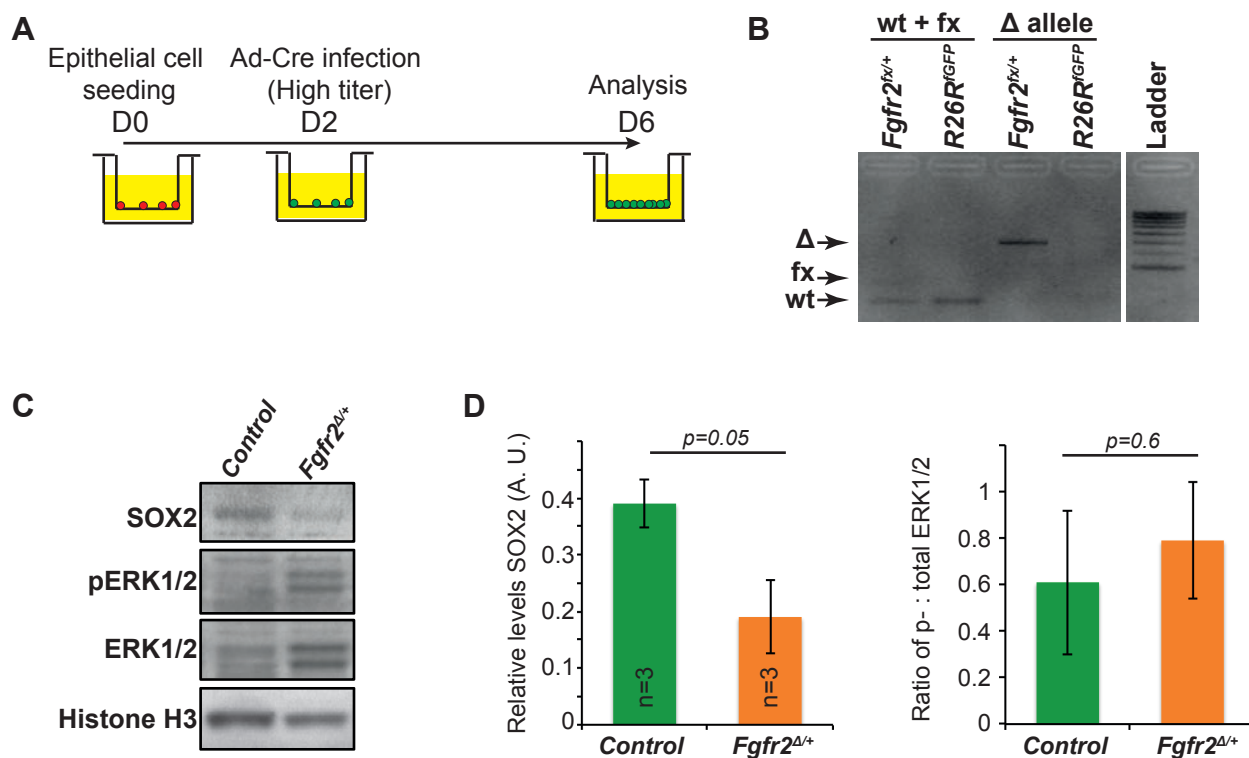

### Figure S3. *Fgfr2* conditional heterozygous tracheal cells fail to terminally differentiate and self-renew in vitro

(A) Experimental schematic. Control (*Rosa26R<sup>fGFP/fGFP</sup>*) and cHet (*Rosa26R<sup>fGFP/+</sup>; Fgfr2<sup>fx/+</sup>*) tracheal epithelial cells were seeded in BC expansion conditions and infected with Ad-Cre at day 2. On day 4 BCs were passaged onto new collagen-coated inserts for further expansion and ALI differentiation. (B) cHet BCs attach and proliferate post-passaging on collagen-coated inserts. (C, D) Control cultures form fully-differentiated monolayers containing multiciliated cells (C) and differentiated BCs (D) by 12 days post-seeding, but cHet BCs do not reach confluence and do not express differentiated markers in vitro. Arrows: fragmented nuclei, or multi-nucleate cells, seen in cHet cultures, but not controls. (E) Experimental schematic. Control (*Rosa26R<sup>fGFP/fGFP</sup>*) and cHet (*Rosa26R<sup>fGFP/+</sup>; Fgfr2<sup>fx/+</sup>*) tracheal epithelial cells were seeded in BC expansion conditions and infected with Ad-Cre at day 2. On day 4 BCs were passaged into matrigel for sphere-forming assays. (F) Representative confocal sections of control and *Fgfr2* cHet cultures 2 days post-seeding in matrigel. Green: KRT8; red: KRT5. (G) Images of control and *Fgfr2* cHet tracheospheres 9 days post-seeding in matrigel. (H) Tracheosphere diameter, arbitrary units. Scale bars = 100  $\mu$ m (B-D, G); 5  $\mu$ m (F).

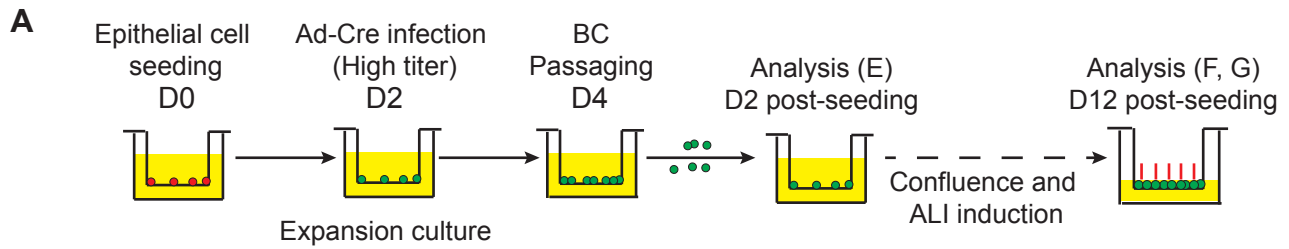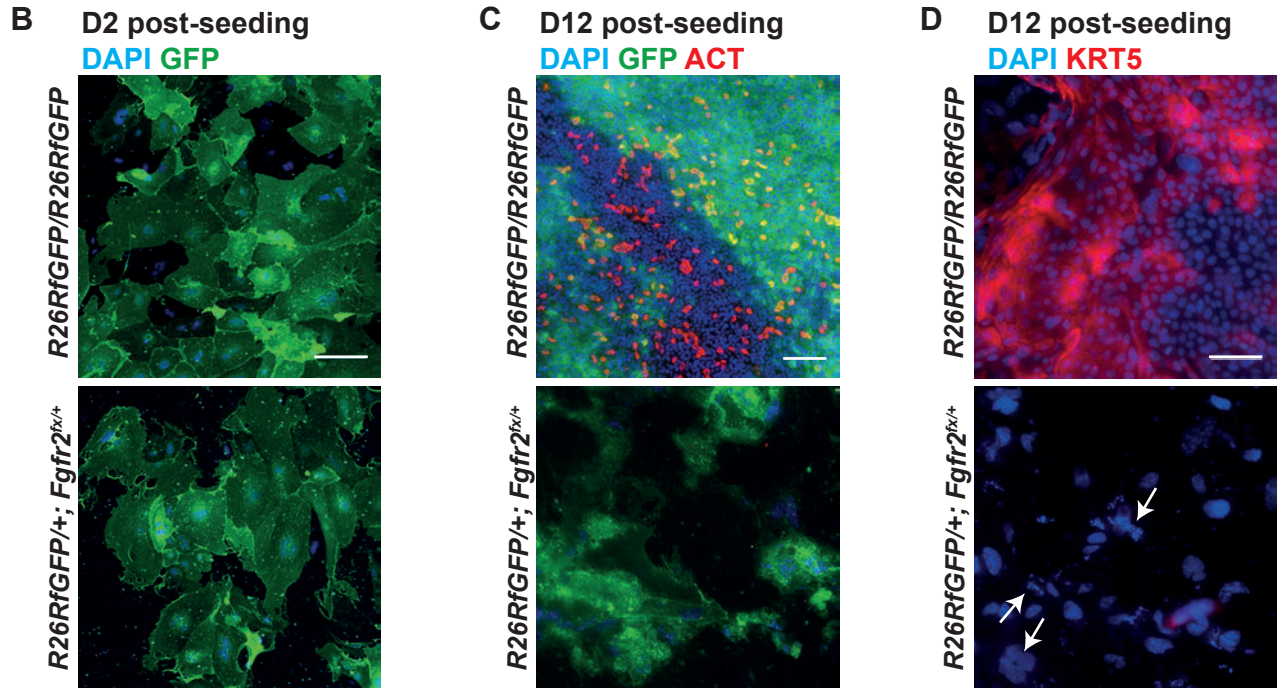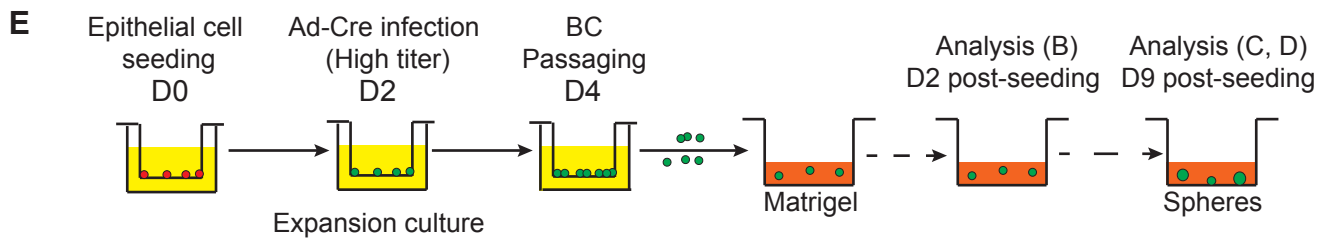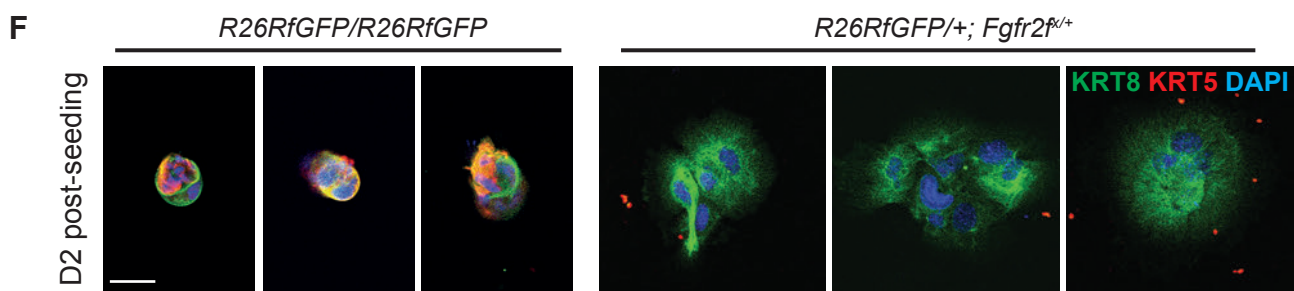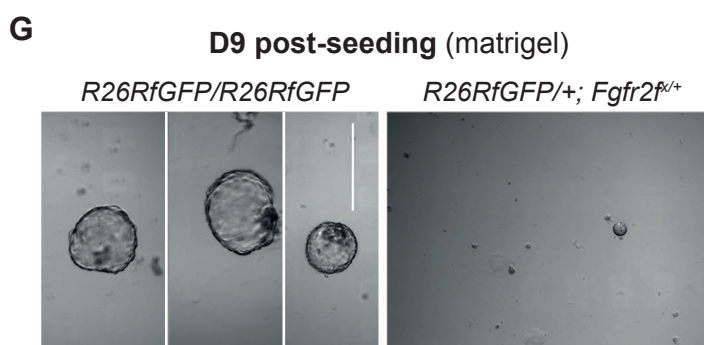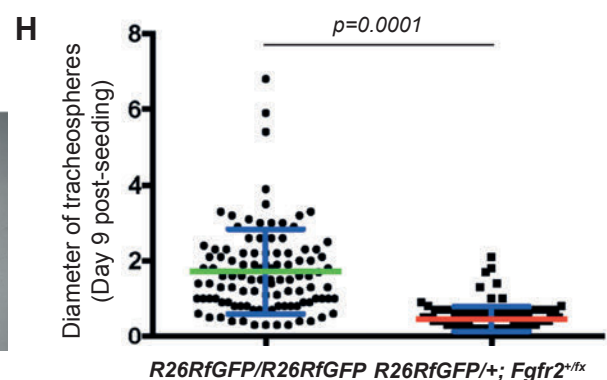

**Figure S4. Decrease in FGFR2 signalling in vitro does not affect levels of MEK-ERK signalling.** (A) Schematic of in vitro experimental time-course. (B) Representative genotyping (gDNA) PCR from *Rosa26R<sup>fGFP/fGFP</sup>* and *Rosa26R<sup>fGFP/+</sup>; Fgfr2<sup>fx/+</sup>* viral-infected cells at day 6. Note that the cHet cells have efficient amplification of the wild-type (wt) and deleted ( $\Delta$ ) alleles, but very little amplification of the floxed (fx) allele indicating high levels of recombination in vitro. (C) Representative western blots from control and *Fgfr2* cHet day 6 basal cells showing levels of SOX2, pERK1/2, total ERK and Histone H3. (F) Quantification of protein levels in (E).



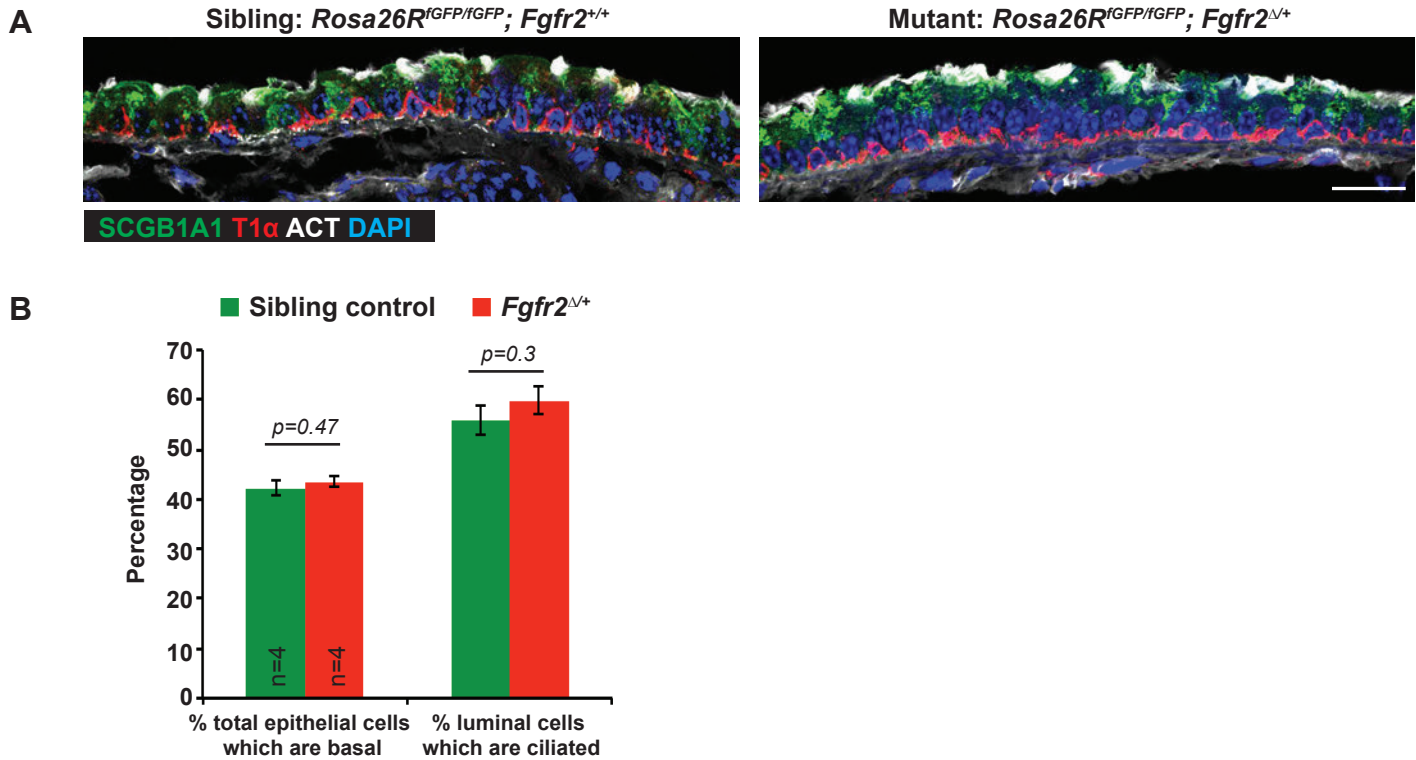

**Figure S5. *Fgfr2<sup>Δ/+</sup>* adult mice have a normal tracheal epithelium.** (A) Representative sections from control *Rosa26R<sup>fGFP/fGFP</sup>* and sibling *Rosa26R<sup>fGFP/fGFP</sup>; Fgfr2<sup>Δ/+</sup>* tracheae. Green: SCGB1A1 (secretory cells); red: T1α (basal cells); white: acetylated tubulin (cilia); blue: DAPI. (B) Quantitation of the percentage of epithelial cells which are basal, and luminal cells which are ciliated in the two genotypes. Error bars = sem. Scale bar = 20 μm.



Fig. S6. Raw cell counts

| Fgf2 conditional heterozygous cell counts |                                   |                  |                   |                   | Figure S2                                       |                   |                  |                 |                  | Figure 1                                             |                                             |                         |                           |             | Figure 2    |                                       |                          |                            |                     | Figure 2                      |                                                 |                                            |                                                |  |
|-------------------------------------------|-----------------------------------|------------------|-------------------|-------------------|-------------------------------------------------|-------------------|------------------|-----------------|------------------|------------------------------------------------------|---------------------------------------------|-------------------------|---------------------------|-------------|-------------|---------------------------------------|--------------------------|----------------------------|---------------------|-------------------------------|-------------------------------------------------|--------------------------------------------|------------------------------------------------|--|
| 3.5 weeks post-tmx                        | Total DAPI+ cells                 | Total GFP+ cells | Ki67+, GFP+ cells | Ki67+, GFP+ cells | % of total GFP+ cells that are dual GFP+, Ki67+ | Total DAPI+ cells | Tia+, GFP+ cells | Tia2+GFP+ cells | Tia+, GFP+ cells | % of total Tia+ basal cells that are dual GFP+, Tia+ | % of total luminal Tia+ cells that are GFP+ | GFP+, Ki67+ basal cells | GFP+, Ki67+ luminal cells | Ki67+ cells | Ki67+ cells | % GFP+ columnar cells from total GFP+ | GFP+, SCGB1A1+ sub cells | GFP+, MUC5AC+ goblet cells | GFP+, MUC5AC+ cells | GFP+, SCGB1A1+, MUC5AC+ cells | % GFP+ cells which are GFP+, SCGB1A1+ sub cells | % GFP+ cells which are GFP+, MUC5AC+ cells | % GFP+ cells which are GFP+, SCGB1A1+, MUC5AC+ |  |
| 1                                         | 1033                              | 64               | 6                 | 0                 | 0.0                                             | 1164              | 564              | 80              | 1                | 14.8                                                 | 0.17                                        | 291                     | 27                        | 0           | 10          | 10                                    | 196                      | 0                          | 259                 | 0                             | 43.1                                            | 56.9                                       | 0                                              |  |
| 2                                         | 1469                              | 96               | 24                | 1                 | 1.0                                             | 1007              | 934              | 201             | 5                | 21.92                                                | 0.61                                        | 227                     | 46                        | 0           | 2           | 10.2                                  | 139                      | 0                          | 238                 | 0                             | 36.9                                            | 63.1                                       | 0                                              |  |
| 3                                         | 1024                              | 228              | 6                 | 2                 | 0.9                                             | 1573              | 789              | 307             | 7                | 38.91                                                | 0.89                                        | 271                     | 18                        | 0           | 5           | 11                                    | 75                       | 0                          | 184                 | 0                             | 29.2                                            | 70.8                                       | 0                                              |  |
| 4                                         | KRT5-CreER/+; R26-RFP/+; Fgf2 D/+ | 216              | 25                | 3                 | 1                                               | 4.0               | 648              | 238             | 82               | 493                                                  | 34.45                                       | 159                     | 32                        | 0           | 8           | 14.3                                  | 31                       | 0                          | 82                  | 0                             | 27.4                                            | 72.6                                       | 0                                              |  |
| 5                                         | KRT5-CreER/+; R26-RFP/+; Fgf2 D/+ | 1523             | 203               | 87                | 18                                              | 8.8               | 1607             | 677             | 221              | 325                                                  | 32.64                                       | 136                     | 22                        | 0           | 6           | 22.2                                  | 30                       | 0                          | 44                  | 0                             | 40.5                                            | 59.5                                       | 0                                              |  |
| 6                                         | KRT5-CreER/+; R26-RFP/+; Fgf2 D/+ | 1523             | 285               | 48                | 9                                               | 1.2               | 1472             | 752             | 241              | 341                                                  | 32.05                                       | 133                     | 24                        | 0           | 9           | 16.2                                  | 119                      | 0                          | 109                 | 0                             | 52.2                                            | 47.8                                       | 0                                              |  |
| 7                                         | KRT5-CreER/+; R26-RFP/+; Fgf2 D/+ | 1001             | 263               | 20                | 9                                               | 2.4               | 1451             | 529             | 212              | 357                                                  | 40.08                                       | 267                     | 55                        | 0           | 20          | 24.6                                  | 63                       | 0                          | 94                  | 1                             | 39.9                                            | 59.5                                       | 0.6                                            |  |
| 8                                         | KRT5-CreER/+; R26-RFP/+; Fgf2 D/+ | 1241             | 429               | 8                 | 2                                               | 0.5               | 1195             | 685             | 301              | 384                                                  | 43.84                                       | 190                     | 5                         | 0           | 20          | 24.6                                  | 139                      | 0                          | 135                 | 2                             | 50.4                                            | 49.9                                       | 0.7                                            |  |
| 9                                         | KRT5-CreER/+; R26-RFP/+; Fgf2 D/+ | 1171             | 408               | 22                | 11                                              | 2.7               | 1283             | 583             | 234              | 349                                                  | 40.14                                       | 159                     | 32                        | 0           | 8           | 14.3                                  | 31                       | 0                          | 82                  | 0                             | 27.4                                            | 72.6                                       | 0                                              |  |
| 10                                        | KRT5-CreER/+; R26-RFP/+; Fgf2 D/+ | 1072             | 218               | 9                 | 2                                               | 0.9               | 1149             | 441             | 151              | 290                                                  | 34.24                                       | 136                     | 22                        | 0           | 6           | 22.2                                  | 30                       | 0                          | 44                  | 0                             | 40.5                                            | 59.5                                       | 0                                              |  |
| 11                                        | KRT5-CreER/+; R26-RFP/+; Fgf2 D/+ | 970              | 347               | 21                | 6                                               | 1.7               | 1505             | 733             | 276              | 457                                                  | 37.65                                       | 164                     | 55                        | 0           | 14          | 28.9                                  | 119                      | 0                          | 109                 | 0                             | 52.2                                            | 47.8                                       | 0                                              |  |
| 12                                        | KRT5-CreER/+; R26-RFP/+; Fgf2 D/+ | 1001             | 263               | 20                | 9                                               | 2.4               | 1451             | 529             | 212              | 357                                                  | 40.08                                       | 267                     | 55                        | 0           | 20          | 24.6                                  | 63                       | 0                          | 94                  | 1                             | 39.9                                            | 59.5                                       | 0.6                                            |  |
| 13                                        | KRT5-CreER/+; R26-RFP/+; Fgf2 D/+ | 1241             | 429               | 8                 | 2                                               | 0.5               | 1195             | 685             | 301              | 384                                                  | 43.84                                       | 190                     | 5                         | 0           | 20          | 24.6                                  | 139                      | 0                          | 135                 | 2                             | 50.4                                            | 49.9                                       | 0.7                                            |  |
| 14                                        | KRT5-CreER/+; R26-RFP/+; Fgf2 D/+ | 1171             | 408               | 22                | 11                                              | 2.7               | 1283             | 583             | 234              | 349                                                  | 40.14                                       | 159                     | 32                        | 0           | 8           | 14.3                                  | 31                       | 0                          | 82                  | 0                             | 27.4                                            | 72.6                                       | 0                                              |  |
| 15                                        | KRT5-CreER/+; R26-RFP/+; Fgf2 D/+ | 1072             | 218               | 9                 | 2                                               | 0.9               | 1149             | 441             | 151              | 290                                                  | 34.24                                       | 136                     | 22                        | 0           | 6           | 22.2                                  | 30                       | 0                          | 44                  | 0                             | 40.5                                            | 59.5                                       | 0                                              |  |
| 16                                        | KRT5-CreER/+; R26-RFP/+; Fgf2 D/+ | 970              | 347               | 21                | 6                                               | 1.7               | 1505             | 733             | 276              | 457                                                  | 37.65                                       | 164                     | 55                        | 0           | 14          | 28.9                                  | 119                      | 0                          | 109                 | 0                             | 52.2                                            | 47.8                                       | 0                                              |  |
| 17                                        | KRT5-CreER/+; R26-RFP/+; Fgf2 D/+ | 1001             | 263               | 20                | 9                                               | 2.4               | 1451             | 529             | 212              | 357                                                  | 40.08                                       | 267                     | 55                        | 0           | 20          | 24.6                                  | 63                       | 0                          | 94                  | 1                             | 39.9                                            | 59.5                                       | 0.6                                            |  |
| 18                                        | KRT5-CreER/+; R26-RFP/+; Fgf2 D/+ | 1241             | 429               | 8                 | 2                                               | 0.5               | 1195             | 685             | 301              | 384                                                  | 43.84                                       | 190                     | 5                         | 0           | 20          | 24.6                                  | 139                      | 0                          | 135                 | 2                             | 50.4                                            | 49.9                                       | 0.7                                            |  |
| 19                                        | KRT5-CreER/+; R26-RFP/+; Fgf2 D/+ | 1171             | 408               | 22                | 11                                              | 2.7               | 1283             | 583             | 234              | 349                                                  | 40.14                                       | 159                     | 32                        | 0           | 8           | 14.3                                  | 31                       | 0                          | 82                  | 0                             | 27.4                                            | 72.6                                       | 0                                              |  |
| 20                                        | KRT5-CreER/+; R26-RFP/+; Fgf2 D/+ | 1072             | 218               | 9                 | 2                                               | 0.9               | 1149             | 441             | 151              | 290                                                  | 34.24                                       | 136                     | 22                        | 0           | 6           | 22.2                                  | 30                       | 0                          | 44                  | 0                             | 40.5                                            | 59.5                                       | 0                                              |  |
| 21                                        | KRT5-CreER/+; R26-RFP/+; Fgf2 D/+ | 970              | 347               | 21                | 6                                               | 1.7               | 1505             | 733             | 276              | 457                                                  | 37.65                                       | 164                     | 55                        | 0           | 14          | 28.9                                  | 119                      | 0                          | 109                 | 0                             | 52.2                                            | 47.8                                       | 0                                              |  |
| 22                                        | KRT5-CreER/+; R26-RFP/+; Fgf2 D/+ | 1001             | 263               | 20                | 9                                               | 2.4               | 1451             | 529             | 212              | 357                                                  | 40.08                                       | 267                     | 55                        | 0           | 20          | 24.6                                  | 63                       | 0                          | 94                  | 1                             | 39.9                                            | 59.5                                       | 0.6                                            |  |
| 23                                        | KRT5-CreER/+; R26-RFP/+; Fgf2 D/+ | 1241             | 429               | 8                 | 2                                               | 0.5               | 1195             | 685             | 301              | 384                                                  | 43.84                                       | 190                     | 5                         | 0           | 20          | 24.6                                  | 139                      | 0                          | 135                 | 2                             | 50.4                                            | 49.9                                       | 0.7                                            |  |
| 24                                        | KRT5-CreER/+; R26-RFP/+; Fgf2 D/+ | 1171             | 408               | 22                | 11                                              | 2.7               | 1283             | 583             | 234              | 349                                                  | 40.14                                       | 159                     | 32                        | 0           | 8           | 14.3                                  | 31                       | 0                          | 82                  | 0                             | 27.4                                            | 72.6                                       | 0                                              |  |
| 25                                        | KRT5-CreER/+; R26-RFP/+; Fgf2 D/+ | 1072             | 218               | 9                 | 2                                               | 0.9               | 1149             | 441             | 151              | 290                                                  | 34.24                                       | 136                     | 22                        | 0           | 6           | 22.2                                  | 30                       | 0                          | 44                  | 0                             | 40.5                                            | 59.5                                       | 0                                              |  |
| 26                                        | KRT5-CreER/+; R26-RFP/+; Fgf2 D/+ | 970              | 347               | 21                | 6                                               | 1.7               | 1505             | 733             | 276              | 457                                                  | 37.65                                       | 164                     | 55                        | 0           | 14          | 28.9                                  | 119                      | 0                          | 109                 | 0                             | 52.2                                            | 47.8                                       | 0                                              |  |
| 27                                        | KRT5-CreER/+; R26-RFP/+; Fgf2 D/+ | 1001             | 263               | 20                | 9                                               | 2.4               | 1451             | 529             | 212              | 357                                                  | 40.08                                       | 267                     | 55                        | 0           | 20          | 24.6                                  | 63                       | 0                          | 94                  | 1                             | 39.9                                            | 59.5                                       | 0.6                                            |  |
| 28                                        | KRT5-CreER/+; R26-RFP/+; Fgf2 D/+ | 1241             | 429               | 8                 | 2                                               | 0.5               | 1195             | 685             | 301              | 384                                                  | 43.84                                       | 190                     | 5                         | 0           | 20          | 24.6                                  | 139                      | 0                          | 135                 | 2                             | 50.4                                            | 49.9                                       | 0.7                                            |  |
| 29                                        | KRT5-CreER/+; R26-RFP/+; Fgf2 D/+ | 1171             | 408               | 22                | 11                                              | 2.7               | 1283             | 583             | 234              | 349                                                  | 40.14                                       | 159                     | 32                        | 0           | 8           | 14.3                                  | 31                       | 0                          | 82                  | 0                             | 27.4                                            | 72.6                                       | 0                                              |  |
| 30                                        | KRT5-CreER/+; R26-RFP/+; Fgf2 D/+ | 1072             | 218               | 9                 | 2                                               | 0.9               | 1149             | 441             | 151              | 290                                                  | 34.24                                       | 136                     | 22                        | 0           | 6           | 22.2                                  | 30                       | 0                          | 44                  | 0                             | 40.5                                            | 59.5                                       | 0                                              |  |
| 31                                        | KRT5-CreER/+; R26-RFP/+; Fgf2 D/+ | 970              | 347               | 21                | 6                                               | 1.7               | 1505             | 733             | 276              | 457                                                  | 37.65                                       | 164                     | 55                        | 0           | 14          | 28.9                                  | 119                      | 0                          | 109                 | 0                             | 52.2                                            | 47.8                                       | 0                                              |  |
| 32                                        | KRT5-CreER/+; R26-RFP/+; Fgf2 D/+ | 1001             | 263               | 20                | 9                                               | 2.4               | 1451             | 529             | 212              | 357                                                  | 40.08                                       | 267                     | 55                        | 0           | 20          | 24.6                                  | 63                       | 0                          | 94                  | 1                             | 39.9                                            | 59.5                                       | 0.6                                            |  |
| 33                                        | KRT5-CreER/+; R26-RFP/+; Fgf2 D/+ | 1241             | 429               | 8                 | 2                                               | 0.5               | 1195             | 685             | 301              | 384                                                  | 43.84                                       | 190                     | 5                         | 0           | 20          | 24.6                                  | 139                      | 0                          | 135                 | 2                             | 50.4                                            | 49.9                                       | 0.7                                            |  |
| 34                                        | KRT5-CreER/+; R26-RFP/+; Fgf2 D/+ | 1171             | 408               | 22                | 11                                              | 2.7               | 1283             | 583             | 234              | 349                                                  | 40.14                                       | 159                     | 32                        | 0           | 8           | 14.3                                  | 31                       | 0                          | 82                  | 0                             | 27.4                                            | 72.6                                       | 0                                              |  |
| 35                                        | KRT5-CreER/+; R26-RFP/+; Fgf2 D/+ | 1072             | 218               | 9                 | 2                                               | 0.9               | 1149             | 441             | 151              | 290                                                  | 34.24                                       | 136                     | 22                        | 0           | 6           | 22.2                                  | 30                       | 0                          | 44                  | 0                             | 40.5                                            | 59.5                                       | 0                                              |  |
| 36                                        | KRT5-CreER/+; R26-RFP/+; Fgf2 D/+ | 970              | 347               | 21                | 6                                               | 1.7               | 1505             | 733             | 276              | 457                                                  | 37.65                                       | 164                     | 55                        | 0           | 14          | 28.9                                  | 119                      | 0                          | 109                 | 0                             | 52.2                                            | 47.8                                       | 0                                              |  |
| 37                                        | KRT5-CreER/+; R26-RFP/+; Fgf2 D/+ | 1001             | 263               | 20                | 9                                               | 2.4               | 1451             | 529             | 212              | 357                                                  | 40.08                                       | 267                     | 55                        | 0           | 20          | 24.6                                  | 63                       | 0                          | 94                  | 1                             | 39.9                                            | 59.5                                       | 0.6                                            |  |
| 38                                        | KRT5-CreER/+; R26-RFP/+; Fgf2 D/+ | 1241             | 429               | 8                 | 2                                               | 0.5               | 1195             | 685             | 301              | 384                                                  | 43.84                                       | 190                     | 5                         | 0           | 20          | 24.6                                  | 139                      | 0                          | 135                 | 2                             | 50.4                                            | 49.9                                       | 0.7                                            |  |
| 39                                        | KRT5-CreER/+; R26-RFP/+; Fgf2 D/+ | 1171             | 408               | 22                | 11                                              | 2.7               | 1283             | 583             | 234              | 349                                                  | 40.14                                       | 159                     | 32                        | 0           | 8           | 14.3                                  | 31                       | 0                          | 82                  | 0                             | 27.4                                            | 72.6                                       | 0                                              |  |
| 40                                        | KRT5-CreER/+; R26-RFP/+; Fgf2 D/+ | 1072             | 218               | 9                 | 2                                               | 0.9               | 1149             | 441             | 151              | 290                                                  | 34.24                                       | 136                     | 22                        | 0           | 6           | 22.2                                  | 30                       | 0                          | 44                  | 0                             | 40.5                                            | 59.5                                       | 0                                              |  |
| 41                                        | KRT5-CreER/+; R26-RFP/+; Fgf2 D/+ | 970              | 347               | 21                | 6                                               | 1.7               | 1505             | 733             | 276              | 457                                                  | 37.65                                       | 164                     | 55                        | 0           | 14          | 28.9                                  | 119                      | 0                          | 109                 | 0                             | 52.2                                            | 47.8                                       | 0                                              |  |
| 42                                        | KRT5-CreER/+; R26-RFP/+; Fgf2 D/+ | 1001             | 263               | 20                | 9                                               | 2.4               | 1451             | 529             | 212              | 357                                                  | 40.08                                       | 267                     | 55                        | 0           | 20          | 24.6                                  | 63                       | 0                          | 94                  | 1                             | 39.9                                            | 59.5                                       | 0.6                                            |  |
| 43                                        | KRT5-CreER/+; R26-RFP/+; Fgf2 D/+ | 1241             | 429               | 8                 | 2                                               | 0.5               | 1195             | 685             | 301              | 384                                                  | 43.84                                       | 190                     | 5                         | 0           | 20          | 24.6                                  | 139                      | 0                          | 135                 | 2                             | 50.4                                            | 49.9                                       | 0.7                                            |  |
| 44                                        | KRT5-CreER/+; R26-RFP/+; Fgf2 D/+ | 1171             | 408               | 22                | 11                                              | 2.7               | 1283             | 583             | 234              | 349                                                  | 40.14                                       | 159                     | 32                        | 0           | 8           | 14.3                                  | 31                       | 0                          | 82                  | 0                             | 27.4                                            | 72.6                                       | 0                                              |  |
| 45                                        | KRT5-CreER/+; R26-RFP/+; Fgf2 D/+ | 1072             | 218               | 9                 | 2                                               | 0.9               | 1149             | 441             | 151              | 290                                                  | 34.24                                       | 136                     | 22                        | 0           | 6           | 22.2                                  | 30                       | 0                          | 44                  | 0                             | 40.5                                            | 59.5                                       | 0                                              |  |
| 46                                        | KRT5-CreER/+; R26-RFP/+; Fgf2 D/+ | 970              | 347               | 21                | 6                                               | 1.7               | 1505             | 733             | 276              | 457                                                  | 37.65                                       | 164                     | 55                        | 0           | 14          | 28.9                                  | 119                      | 0                          | 109                 | 0                             | 52.2                                            | 47.8                                       | 0                                              |  |
| 47                                        | KRT5-CreER/+; R26-RFP/+; Fgf2 D/+ | 1001             | 263               | 20                | 9                                               | 2.4               | 1451             | 529             | 212              | 357                                                  | 40.08                                       | 267                     | 55                        | 0           | 20          | 24.6                                  | 63                       | 0                          | 94                  | 1                             | 39.9                                            | 59.5                                       | 0.6                                            |  |
| 48                                        | KRT5-CreER/+; R26-RFP/+; Fgf2 D/+ | 1241             | 429               | 8                 | 2                                               | 0.5               | 1195             | 685             | 301              | 384                                                  | 43.84                                       | 190                     | 5                         | 0           | 20          | 24.6                                  | 139                      | 0                          | 135                 | 2                             | 50.4                                            | 49.9                                       | 0.7                                            |  |
| 49                                        | KRT5-CreER/+; R26-RFP/+; Fgf2 D/+ | 1171             | 408               | 22                | 11                                              | 2.7               | 1283             | 583             | 234              | 349                                                  | 40.14                                       | 159                     | 32                        | 0           | 8           | 14.3                                  | 31                       | 0                          | 82                  | 0                             | 27.4                                            | 72.6                                       | 0                                              |  |
| 50                                        | KRT5-CreER/+; R26-RFP/+; Fgf2 D/+ | 1072             | 218               | 9                 | 2                                               | 0.9               | 1149             | 441             | 151              | 290                                                  | 34.24                                       | 136                     | 22                        | 0           | 6           | 22.2                                  | 30                       | 0                          | 44                  | 0                             | 40.5                                            | 59.5                                       | 0                                              |  |
| 51                                        | KRT5-CreER/+; R26-RFP/+; Fgf2 D/+ | 970              | 347               | 21                | 6                                               | 1.7               | 1505             | 733             | 276              | 457                                                  | 37.65                                       | 164                     | 55                        | 0           | 14          | 28.9                                  | 119                      | 0                          | 109                 | 0                             | 52.2                                            | 47.8                                       | 0                                              |  |
| 52                                        | KRT5-CreER/+; R26-RFP/+; Fgf2 D/+ | 1001             | 263               | 20                | 9                                               | 2.4               | 1451             | 529             | 212              | 357                                                  |                                             |                         |                           |             |             |                                       |                          |                            |                     |                               |                                                 |                                            |                                                |  |

## Movies

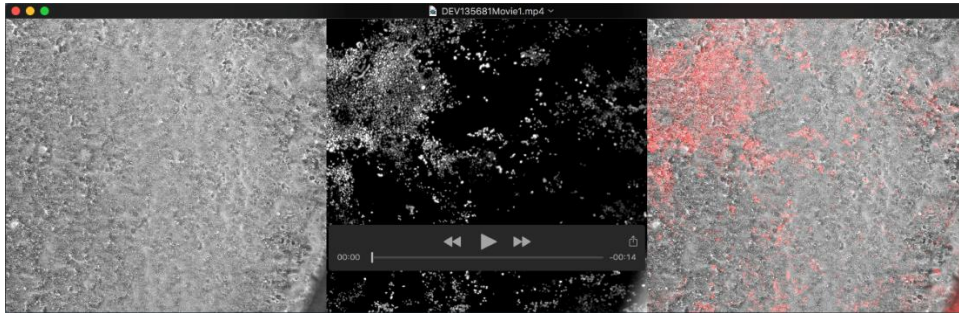

**Movie 1. In vitro cell competition at confluence, control culture.** Red cells: *Fgfr2<sup>Δ/+</sup>*, unlabelled cells: *Fgfr2<sup>Δ/+</sup>*. Confluent culture imaged every 4 hours for 10 days in a Nikon Biostation. Cell clones do not change in size; no evidence for cell competition.

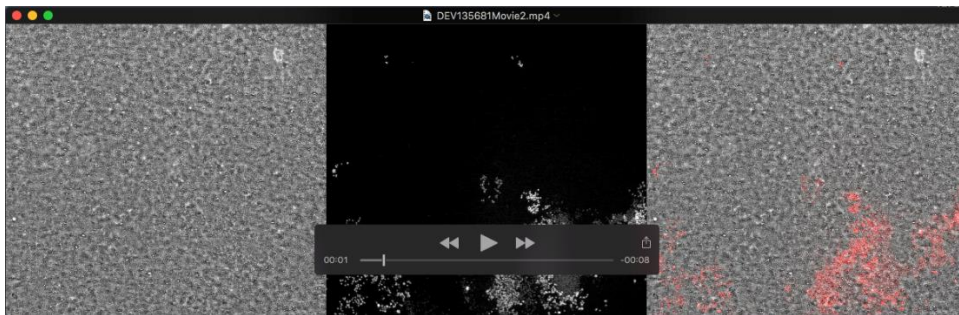

**Movie 2. In vitro cell competition at confluence, experimental culture.** Red cells: *Fgfr2<sup>Δ/+</sup>*, unlabelled cells: *Fgfr2<sup>+/+</sup>*. Confluent culture imaged every 4 hours for 10 days in a Nikon Biostation. Cell clones do not change in size; no evidence for cell competition.

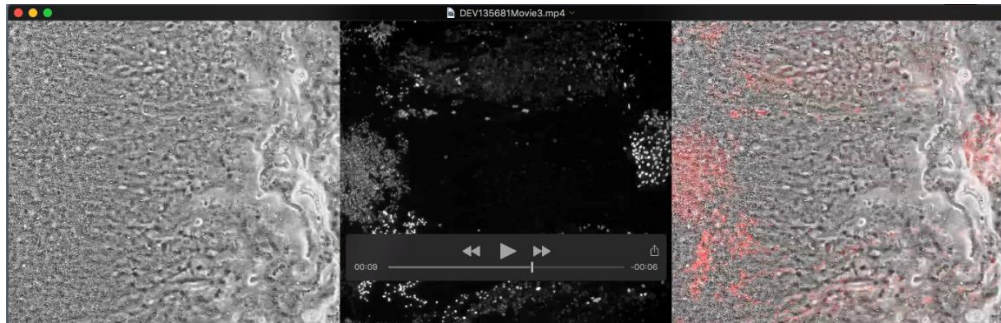

**Movie 3. In vitro cell competition following wounding, control culture.** Red cells: *Fgfr2*<sup>Δ/+</sup>, unlabelled cells: *Fgfr2*<sup>Δ/+</sup>. Confluent culture was wounded and then imaged every 2 hours for 5 days in a Nikon Biostation. Both cell populations expand into the wound equally; no evidence for cell competition.

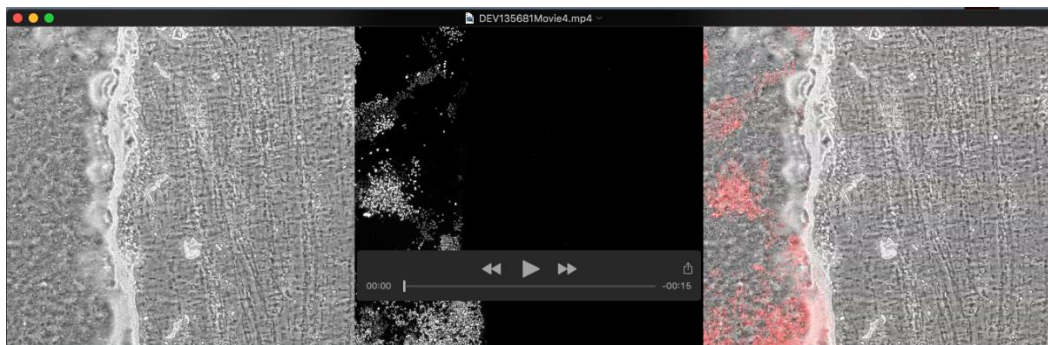

**Movie 4. In vitro cell competition following wounding, experimental culture 1.** Red cells: *Fgfr2*<sup>Δ/+</sup>, unlabelled cells: *Fgfr2*<sup>+/+</sup>. Confluent culture was wounded and then imaged every 2 hours for 5 days in a Nikon Biostation. Both cell populations expand into the wound equally; no evidence for cell competition.

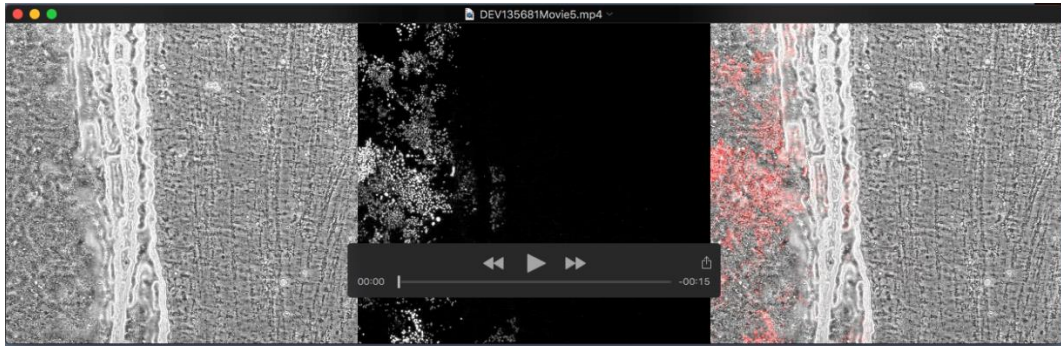

**Movie 5. In vitro cell competition following wounding, experimental culture 2.** Red cells: *Fgfr2<sup>Δ/+</sup>*, unlabelled cells: *Fgfr2<sup>+/+</sup>*. Confluent culture was wounded and then imaged every 2 hours for 5 days in a Nikon Biostation. Both cell populations expand into the wound equally; no evidence for cell competition.



**Table S1. Antibodies****Primary antibodies used for immunostaining on tissue sections or cells**

| Protein            | Species | Dilution Factor | Antigen Retrieval* | Company      | Order number/clone |
|--------------------|---------|-----------------|--------------------|--------------|--------------------|
| Acetylated tubulin | Mouse   | 1:3000          | No                 | Sigma        | T7451              |
| Cleaved Caspase-3  | Rabbit  | 1:100           | No                 | AbCam        | ab2302             |
| E-cadherin         | Rat     | 1:3000          | No                 | ThermoFisher | 13-1900            |
| FGFR2              | Rabbit  | 1:200           | No                 | Santa Cruz   | sc-122             |
| GFP                | Chick   | 1:1000          | No                 | AbCam        | AB13970            |
| Keratin5           | Rabbit  | 1:500           | No                 | Covance      | PRB-160P           |
| Keratin8           | Rat     | 1:200           | No                 | DSHB         | TROMA-1            |
| KI67               | Mouse   | 1:200           | Yes                | BD           | 550609             |
| MUC5AC             | Mouse   | 1:500           | No                 | ThermoFisher | MS-145P0           |
| SCGB1A1            | Goat    | 1:400           | No                 | Santa Cruz   | sc9772             |
| SOX2               | Goat    | 1:200           | No                 | Santa Cruz   | clone Y-17         |
| T1 $\alpha$        | Hamster | 1:1000          | No                 | DSHB         | 8.1.1              |

\*Antigen retrieval by boiling tissue sections in 10 mM sodium citrate, pH 8 for Ki67.

**Primary antibodies used for western blot**

| Protein        | Dilution Factor | Company         | Order number/clone |
|----------------|-----------------|-----------------|--------------------|
| p-Akt(S473)    | 1:3000          | Cell Signalling | 3787               |
| Akt (pan)      | 1:1000          | Cell Signalling | 4691               |
| dpErk1/2       | 1:300           | Cell Signalling | 4370               |
| Erk1/2 (total) | 1:300           | Cell Signalling | 4695               |
| SOX2           | 1:3000          | AbCam           | ab97959            |
| Histone H3     | 1:10000         | AbCam           | ab39655            |
| $\beta$ -actin | 1:50000         | Sigma           | A3854              |

**Fluorescent secondary antibodies**

All at 1:2000 from ThermoFisher Scientific (Molecular Probes)

|                        |        |
|------------------------|--------|
| Donkey anti-mouse 488  | A21202 |
| Goat anti-chick 488    | A11039 |
| Donkey anti-goat 488   | A11055 |
| Donkey anti-rabbit 488 | A21206 |
| Donkey anti-mouse 546  | A10036 |
| Donkey anti-rabbit 546 | A10040 |
| Donkey anti-goat 555   | A21432 |
| Goat anti-hamster 568  | A21112 |
| Donkey anti-rat 594    | A21209 |
| Donkey anti-mouse 647  | A31571 |
| Donkey anti-rabbit 647 | A31573 |
| Goat anti hamster 647  | A21451 |
| Goat anti-rat 647      | A21247 |
